# Supplementary material
Source: PubMed Central journal article supplement (PMC3597086)
Supplement: NIHMS402060-supplement-1_si_001.pdf [file NIHMS402060-supplement-1_si_001.pdf]

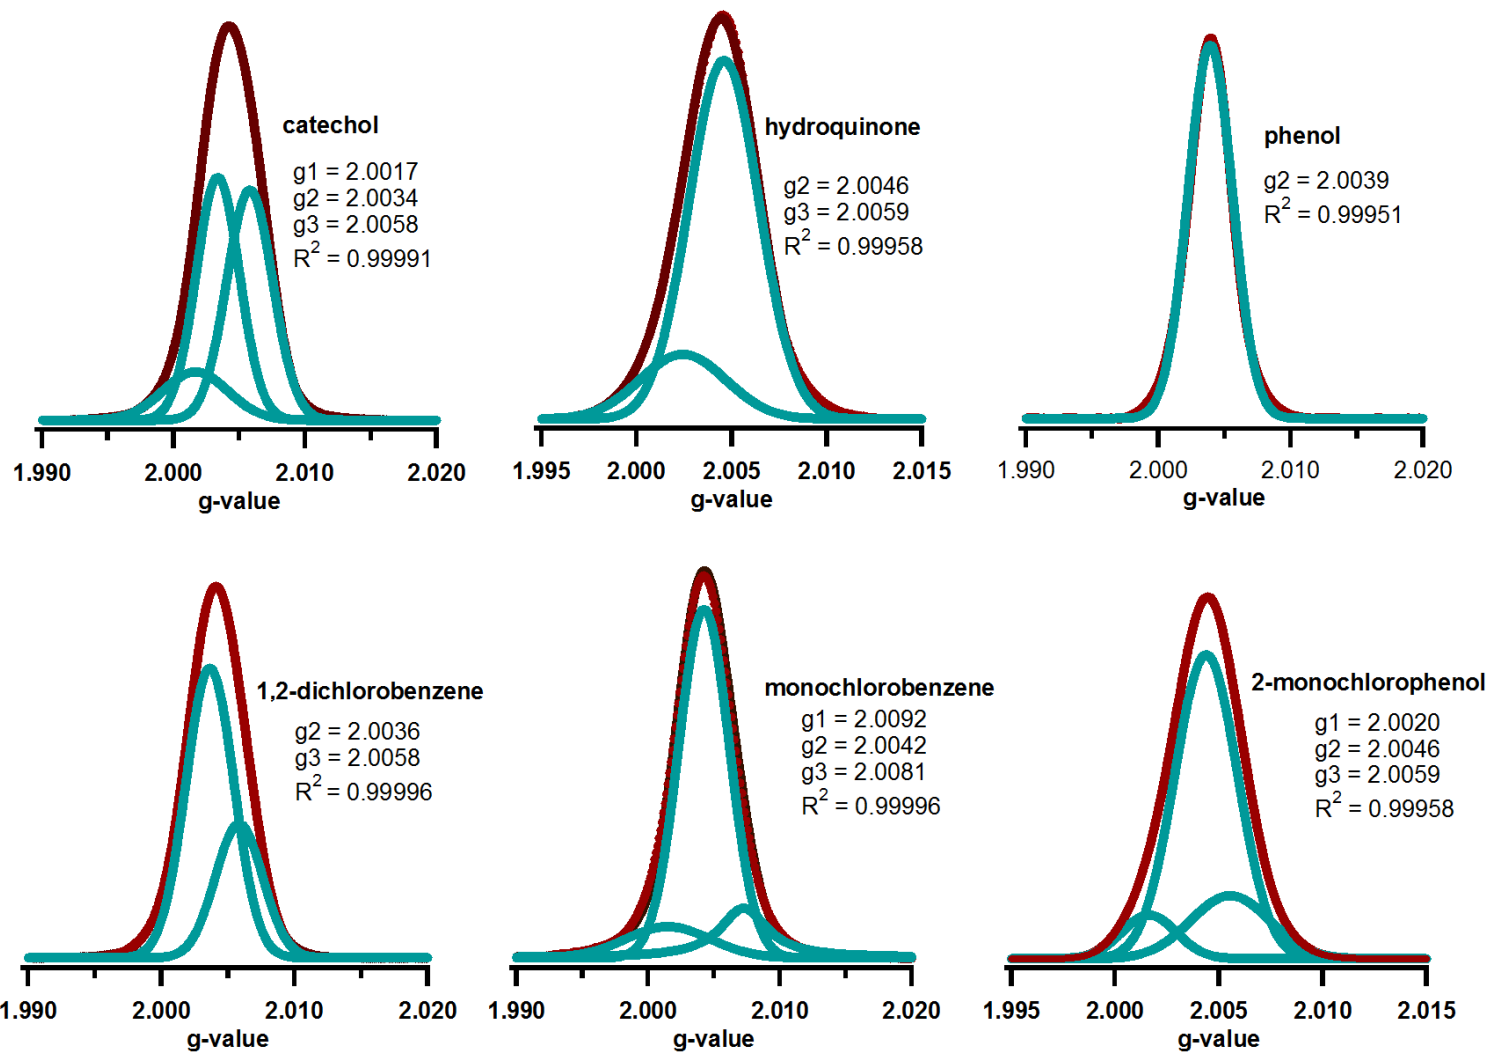

**Figure S1:** Examples of spectral peak fitting of EPR signals from Ni(II)O/silica dosed with CT, HQ, PH, 1,2-DCBz, MCBz, and 2-MCP.
